# Supplementary material for: Analysis of the distributions of hourly NO 2 concentrations contributing to annual average NO 2 concentrations across the European monitoring network between 2000 and 2014
Source: Copernicus journal article supplement (doi:10.5194/acp-2017-910), 2017-10-24
Supplement: Supplementary file 1 [file acp-2017-910-supplement.pdf]

# Supplemental Information

## Analysis of the distributions of hourly NO<sub>2</sub> concentrations contributing to annual average NO<sub>2</sub> concentrations across the European monitoring network between 2000 and 2014

C.S. Malley, E. von Schneidemesser, S. Moller, C.F. Braban, W.K. Hicks, M.R. Heal

This Supplemental Information contains 19 figures:

**Figure S1:** The proportion of within-cluster variance explained as a function of number of clusters for monitoring sites with 2010-2014 average annual NO<sub>2</sub> concentrations between 60 and 70 µg m<sup>-3</sup>. The red dot indicates the number of clusters into which sites were grouped.

**Figure S2:** The proportion of within-cluster variance explained as a function of number of clusters for monitoring sites with 2010-2014 average annual NO<sub>2</sub> concentrations between 50 and 60 µg m<sup>-3</sup>. The red dot indicates the number of clusters into which sites were grouped.

**Figure S3:** The proportion of within-cluster variance explained as a function of number of clusters for monitoring sites with 2010-2014 average annual NO<sub>2</sub> concentrations between 40 and 50 µg m<sup>-3</sup>. The red dot indicates the number of clusters into which sites were grouped.

**Figure S4:** The proportion of within-cluster variance explained as a function of number of clusters for monitoring sites with 2010-2014 annual NO<sub>2</sub> concentrations between 30 and 40 µg m<sup>-3</sup>. The red dot indicates the number of clusters into which sites were grouped.

**Figure S5:** The proportion of within-cluster variance explained as a function of number of clusters for monitoring sites with 2010-2014 annual NO<sub>2</sub> concentrations between 20 and 30 µg m<sup>-3</sup>. The red dot indicates the number of clusters into which sites were grouped.

**Figure S6:** The proportion of within-cluster variance explained as a function of number of clusters for monitoring sites with 2010-2014 annual NO<sub>2</sub> concentrations between 10 and 20 µg m<sup>-3</sup>. The red dot indicates the number of clusters into which sites were grouped.

**Figure S7:** The proportion of within-cluster variance explained as a function of number of clusters for monitoring sites with 2010-2014 annual NO<sub>2</sub> concentrations between 0 and 10 µg m<sup>-3</sup>. The red dot indicates the number of clusters into which sites were grouped.

**Figure S8:** Map of countries assigned to the European regions used in Figure 3.

**Figure S9:** Map of sites with 2010-2014 annual NO<sub>2</sub> concentrations (NO<sub>2AA</sub>) between 60-70 µg m<sup>-3</sup>, grouped into clusters demarcating distinct variations in monthly, hour of day, and hourly NO<sub>2</sub> concentration bin contributions to 2010-2014 NO<sub>2AA</sub>.

**Figure S10:** Map of sites with 2010-2014 annual NO<sub>2</sub> concentrations (NO<sub>2AA</sub>) between 50-60 µg m<sup>-3</sup>, grouped into clusters demarcating distinct variations in monthly, hour of day, and hourly NO<sub>2</sub> concentration bin contributions to 2010-2014 NO<sub>2AA</sub>.

**Figure S11:** Map of sites with 2010-2014 annual NO<sub>2</sub> concentrations (NO<sub>2AA</sub>) between 40-50 µg m<sup>-3</sup>, grouped into clusters demarcating distinct variations in monthly, hour of day, and hourly NO<sub>2</sub> concentration bin contributions to 2010-2014 NO<sub>2AA</sub>.

**Figure S12:** Map of sites with 2010-2014 annual NO<sub>2</sub> concentrations (NO<sub>2AA</sub>) between 30-40 µg m<sup>-3</sup>, grouped into clusters demarcating distinct variations in monthly, hour of day, and hourly NO<sub>2</sub> concentration bin contributions to 2010-2014 NO<sub>2AA</sub>.

**Figure S13:** Map of sites with 2010-2014 annual NO<sub>2</sub> concentrations (NO<sub>2AA</sub>) between 20-30 µg m<sup>-3</sup>, grouped into clusters demarcating distinct variations in monthly, hour of day, and hourly NO<sub>2</sub> concentration bin contributions to 2010-2014 NO<sub>2AA</sub>.

**Figure S14:** Map of sites with 2010-2014 annual NO<sub>2</sub> concentrations (NO<sub>2AA</sub>) between 10-20 µg m<sup>-3</sup>, grouped into clusters demarcating distinct variations in monthly, hour of day, and hourly NO<sub>2</sub> concentration bin contributions to 2010-2014 NO<sub>2AA</sub>.

**Figure S15:** Map of sites with 2010-2014 annual NO<sub>2</sub> concentrations (NO<sub>2AA</sub>) between 0-10 µg m<sup>-3</sup>, grouped into clusters demarcating distinct variations in monthly, hour of day, and hourly NO<sub>2</sub> concentration bin contributions to 2010-2014 NO<sub>2AA</sub>.

**Figure S16:** Comparison of the direction and magnitude of the trend in annual NO<sub>2</sub> concentrations between 2000 and 2014 at 259 sites across Europe using the Theil-Sen statistic and first order autoregressive (AR(1)) model.

**Figure S17:** Magnitude and significance of trend in annual average NO<sub>2</sub> concentrations between 2000 and 2014, with sites separated into panels based on 2010-2014 average annual NO<sub>2</sub> concentrations (NO<sub>2AA</sub>). The fill colour in each point denotes the magnitude and direction of the Theil-Sen trend at a site, and the outer colour denotes whether the trend was statistically significant ( $p \leq 0.05$ , green), or not statistically significant ( $p > 0.05$ , orange). Trend estimates were calculated using the Theil-Sen statistic and block bootstrapping.

**Figure S18:** Proportion of sites with significant decreasing (blue), increasing (red) ( $p \leq 0.05$ ), and non-significant (grey) trends in the monthly percentage contribution to annual average NO<sub>2</sub> between 2000 and 2014, for sites with 2010-2014 average annual NO<sub>2</sub> concentrations (NO<sub>2AA</sub>) of a) >80 µg m<sup>-3</sup>, b) 60-70 µg m<sup>-3</sup>, c) 50-60 µg m<sup>-3</sup>, d) 40-50 µg m<sup>-3</sup>, 30-40 µg m<sup>-3</sup>, 20-30 µg m<sup>-3</sup>, 10-20 µg m<sup>-3</sup>, 0-10 µg m<sup>-3</sup>. Trend estimates were calculated using the Theil-Sen statistic and block bootstrapping. The black line represents the division between decreasing and increasing trends within the non-significant bar.

**Figure S19:** Proportion of sites with significant decreasing (blue), increasing (red) ( $p \leq 0.05$ ), and non-significant (grey) trends in the percentage contribution of each hour of day to annual average NO<sub>2</sub> between 2000 and 2014, for sites with 2010-2014 average annual NO<sub>2</sub> concentrations (NO<sub>2AA</sub>) of a) >80 µg m<sup>-3</sup>, b) 60-70 µg m<sup>-3</sup>, c) 50-60 µg m<sup>-3</sup>, d) 40-50 µg m<sup>-3</sup>, 30-40 µg m<sup>-3</sup>, 20-30 µg m<sup>-3</sup>, 10-20 µg m<sup>-3</sup>, 0-10

$\mu\text{g m}^{-3}$ . Trend estimates were calculated using the Theil-Sen statistic and block bootstrapping. The black line represents the division between decreasing and increasing trends within the non-significant bar.

**Figure S20:** Proportion of sites with significant decreasing (blue), increasing (red) ( $p < 0.05$ ), and non-significant (grey) trends in the percentage contribution from hourly  $\text{NO}_2$  concentrations in  $5 \mu\text{g m}^{-3}$  bins to annual average  $\text{NO}_2$  between 2000 and 2014, for sites with 2010-2014 average annual  $\text{NO}_2$  concentrations ( $\text{NO}_{2\text{AA}}$ ) of a)  $>80 \mu\text{g m}^{-3}$ , b)  $60\text{-}70 \mu\text{g m}^{-3}$ , c)  $50\text{-}60 \mu\text{g m}^{-3}$ , d)  $40\text{-}50 \mu\text{g m}^{-3}$ ,  $30\text{-}40 \mu\text{g m}^{-3}$ ,  $20\text{-}30 \mu\text{g m}^{-3}$ ,  $10\text{-}20 \mu\text{g m}^{-3}$ ,  $0\text{-}10 \mu\text{g m}^{-3}$ . Trend estimates were calculated using the Theil-Sen statistic and block bootstrapping. The black line represents the division between decreasing and increasing trends within the non-significant bar.

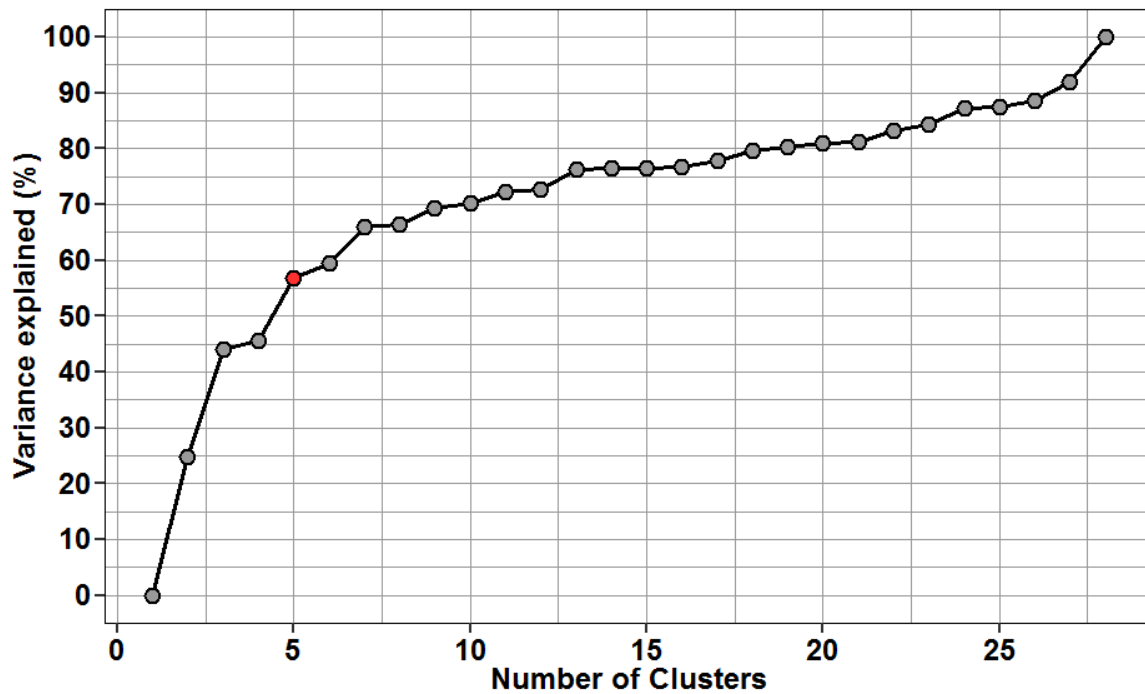

**Figure S1:** The proportion of within-cluster variance explained as a function of number of clusters for monitoring sites with 2010-2014 average annual NO<sub>2</sub> concentrations between 60 and 70  $\mu\text{g m}^{-3}$ . The red dot indicates the number of clusters into which sites were grouped.

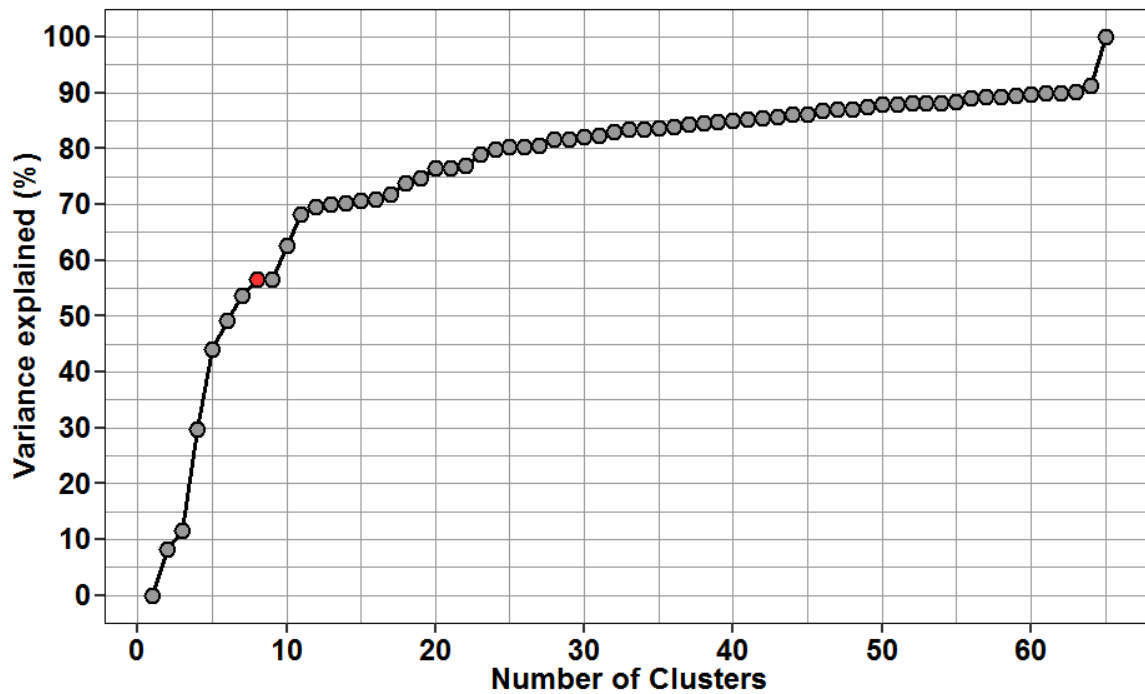

**Figure S2:** The proportion of within-cluster variance explained as a function of number of clusters for monitoring sites with 2010-2014 average annual NO<sub>2</sub> concentrations between 50 and 60  $\mu\text{g m}^{-3}$ . The red dot indicates the number of clusters into which sites were grouped.

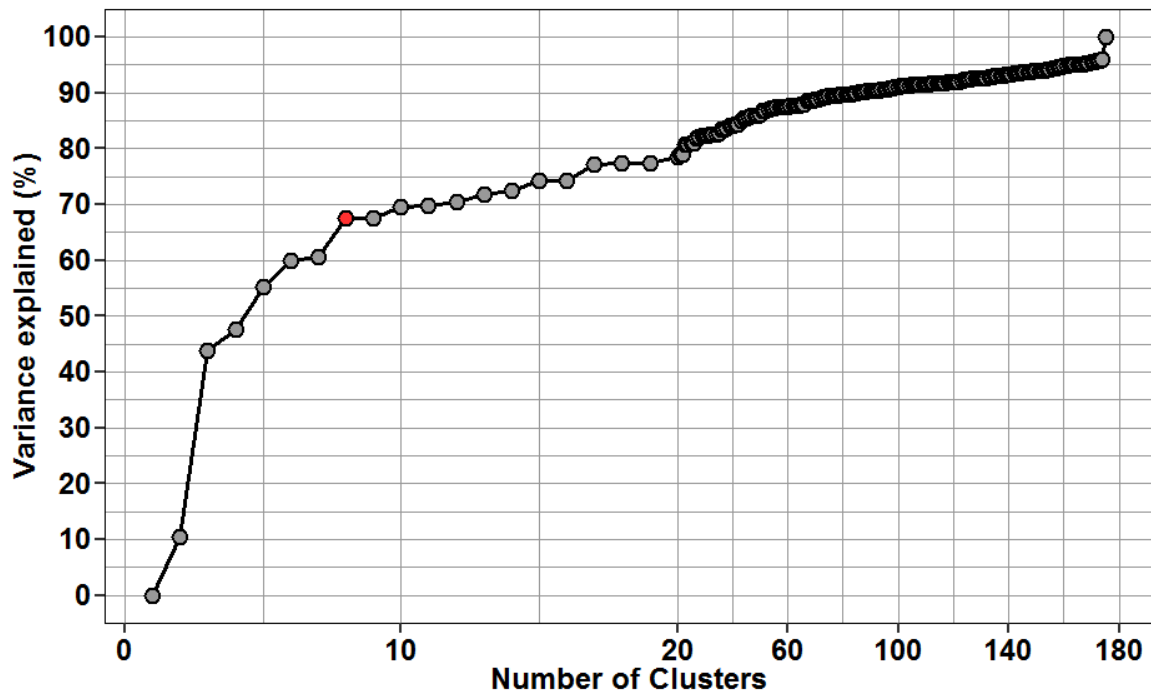

**Figure S3:** The proportion of within-cluster variance explained as a function of number of clusters for monitoring sites with 2010-2014 average annual NO<sub>2</sub> concentrations between 40 and 50  $\mu\text{g m}^{-3}$ . The red dot indicates the number of clusters into which sites were grouped.

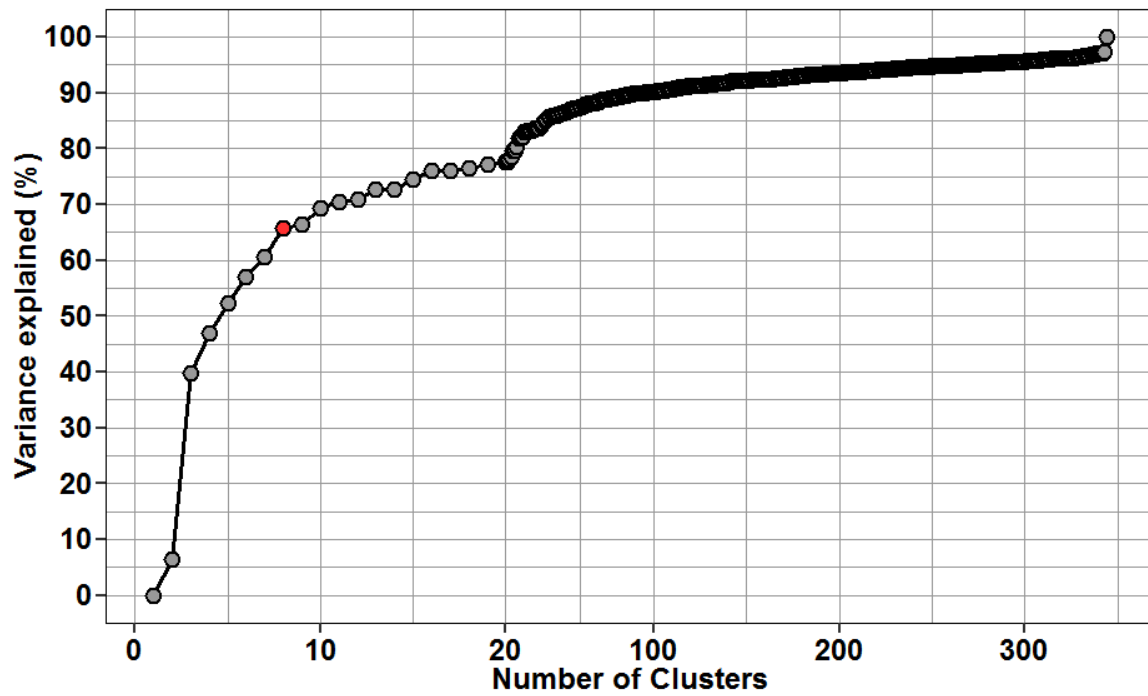

**Figure S4:** The proportion of within-cluster variance explained as a function of number of clusters for monitoring sites with 2010-2014 annual NO<sub>2</sub> concentrations between 30 and 40  $\mu\text{g m}^{-3}$ . The red dot indicates the number of clusters into which sites were grouped.

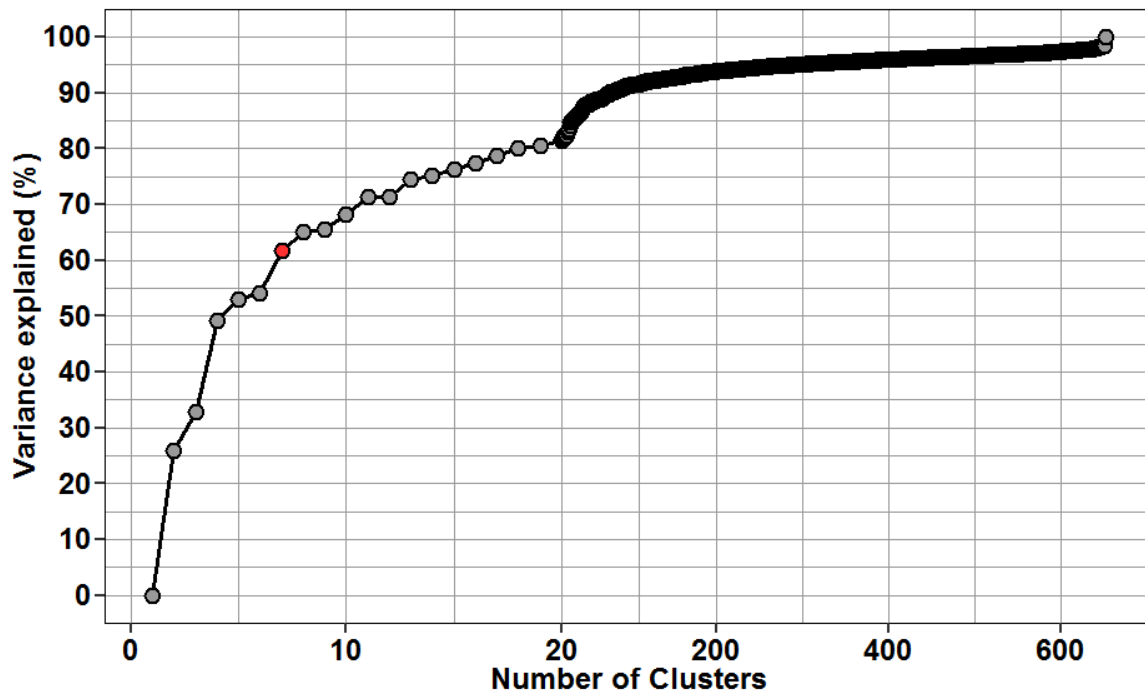

**Figure S5:** The proportion of within-cluster variance explained as a function of number of clusters for monitoring sites with 2010-2014 annual NO<sub>2</sub> concentrations between 20 and 30  $\mu\text{g m}^{-3}$ . The red dot indicates the number of clusters into which sites were grouped.



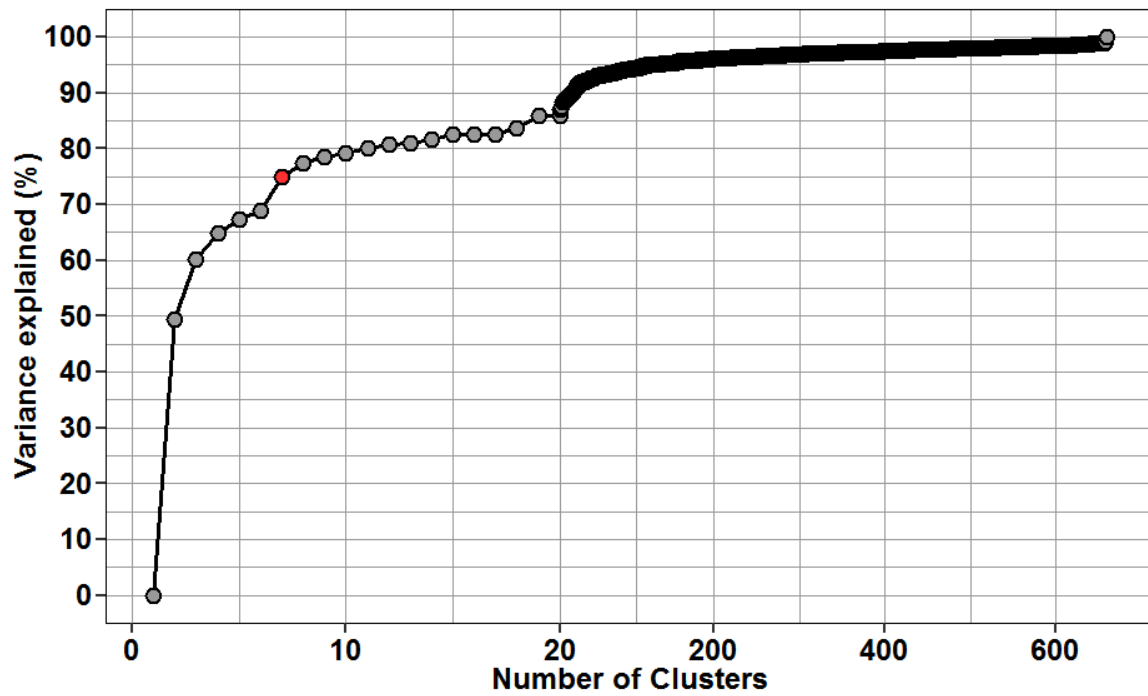

**Figure S6:** The proportion of within-cluster variance explained as a function of number of clusters for monitoring sites with 2010-2014 annual  $\text{NO}_2$  concentrations between 10 and  $20 \mu\text{g m}^{-3}$ . The red dot indicates the number of clusters into which sites were grouped.

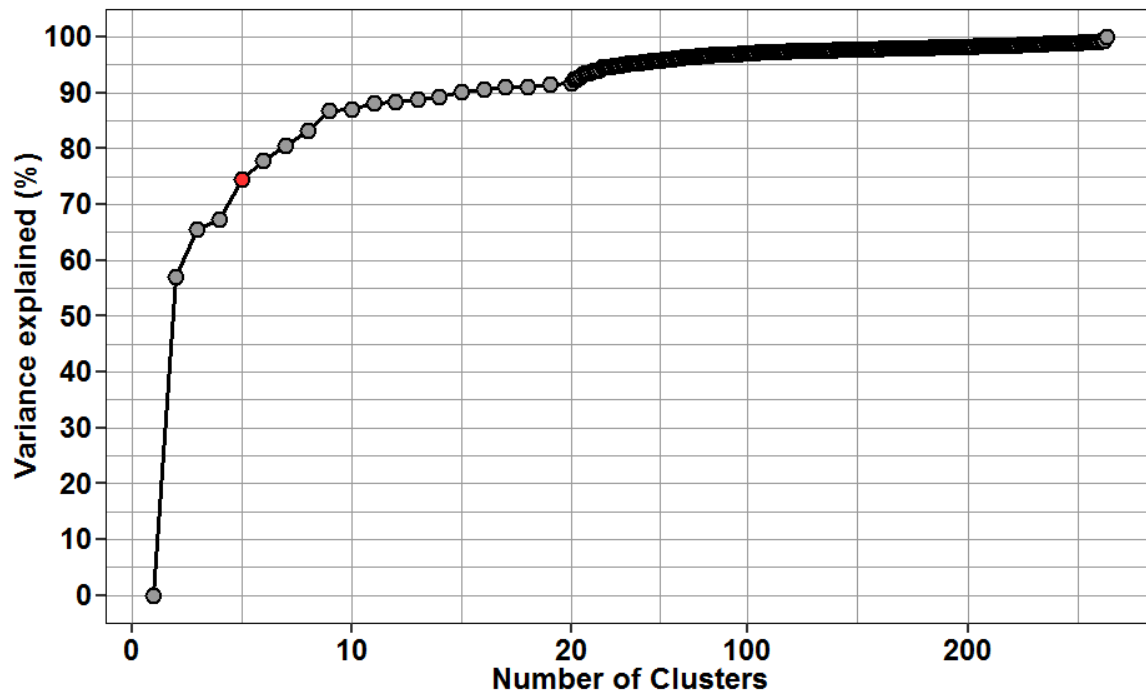

**Figure S7:** The proportion of within-cluster variance explained as a function of number of clusters for monitoring sites with 2010-2014 annual NO<sub>2</sub> concentrations between 0 and 10  $\mu\text{g m}^{-3}$ . The red dot indicates the number of clusters into which sites were grouped.

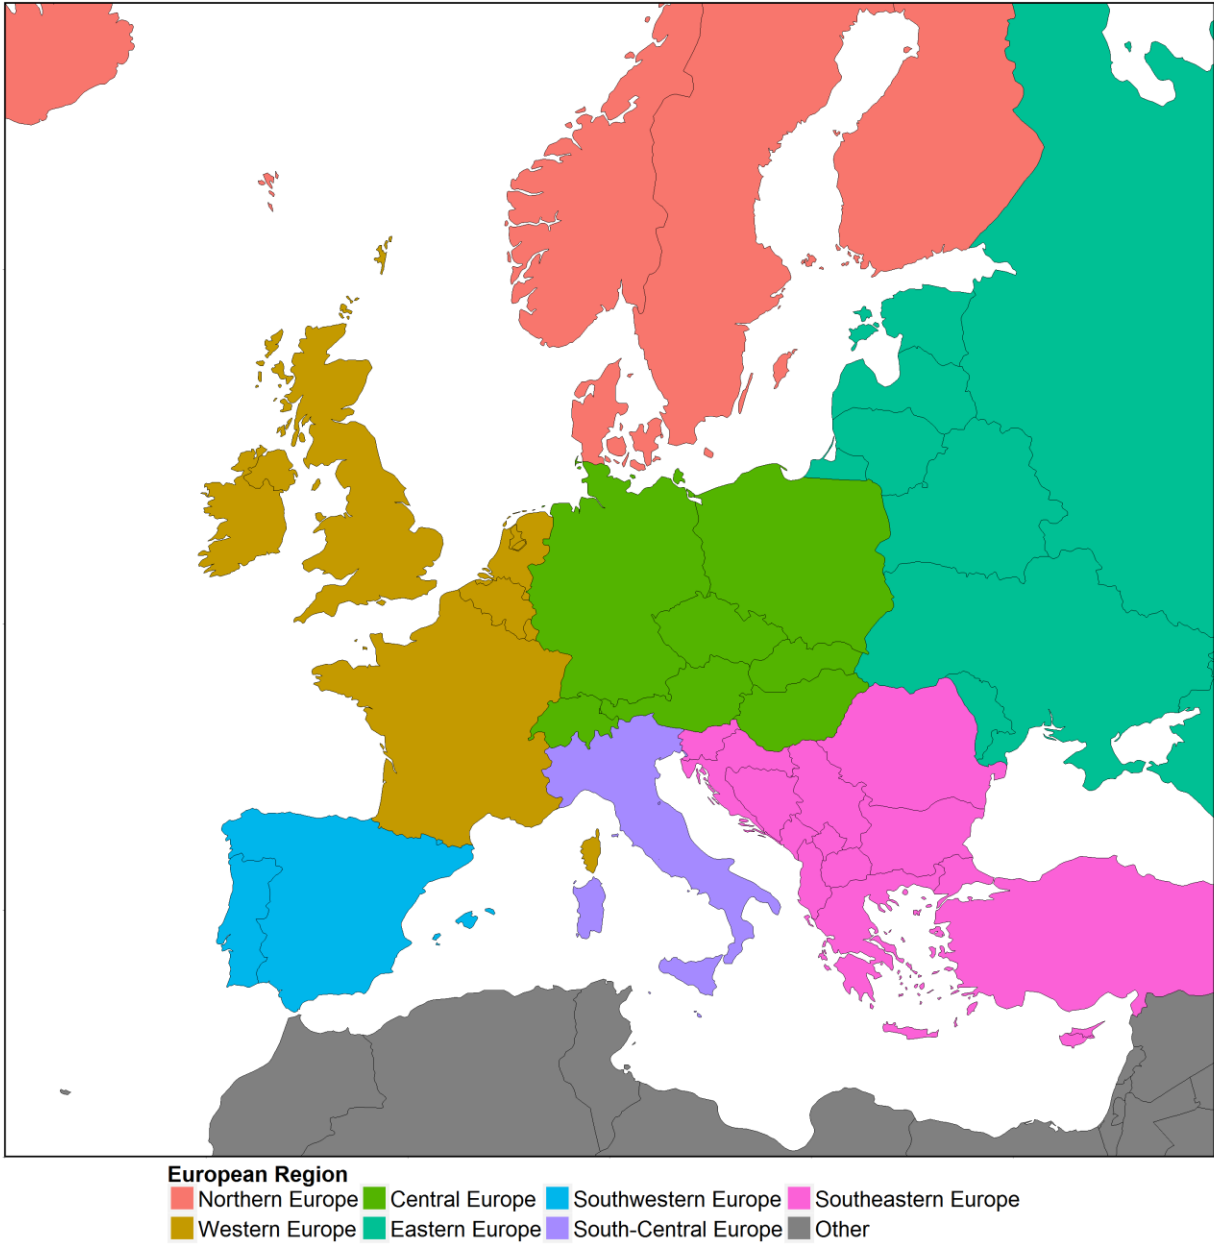

**Figure S8:** Map of countries assigned to the European regions used in Figure 3.

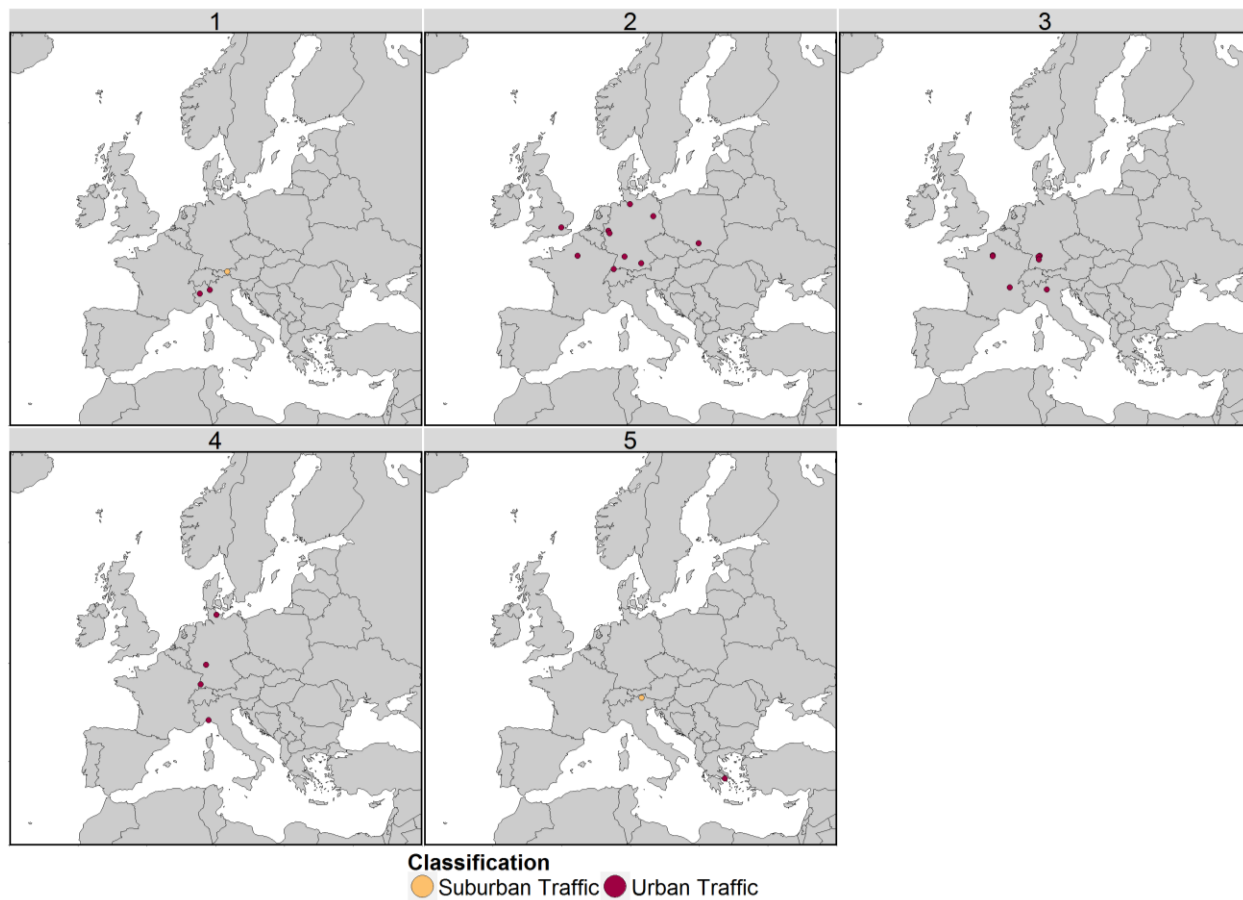

**Figure S9:** Map of sites with 2010-2014 annual  $\text{NO}_2$  concentrations ( $\text{NO}_{2\text{AA}}$ ) between  $60\text{-}70 \mu\text{g m}^{-3}$ , grouped into clusters demarcating distinct variations in monthly, hour of day, and hourly  $\text{NO}_2$  concentration bin contributions to 2010-2014  $\text{NO}_{2\text{AA}}$ .

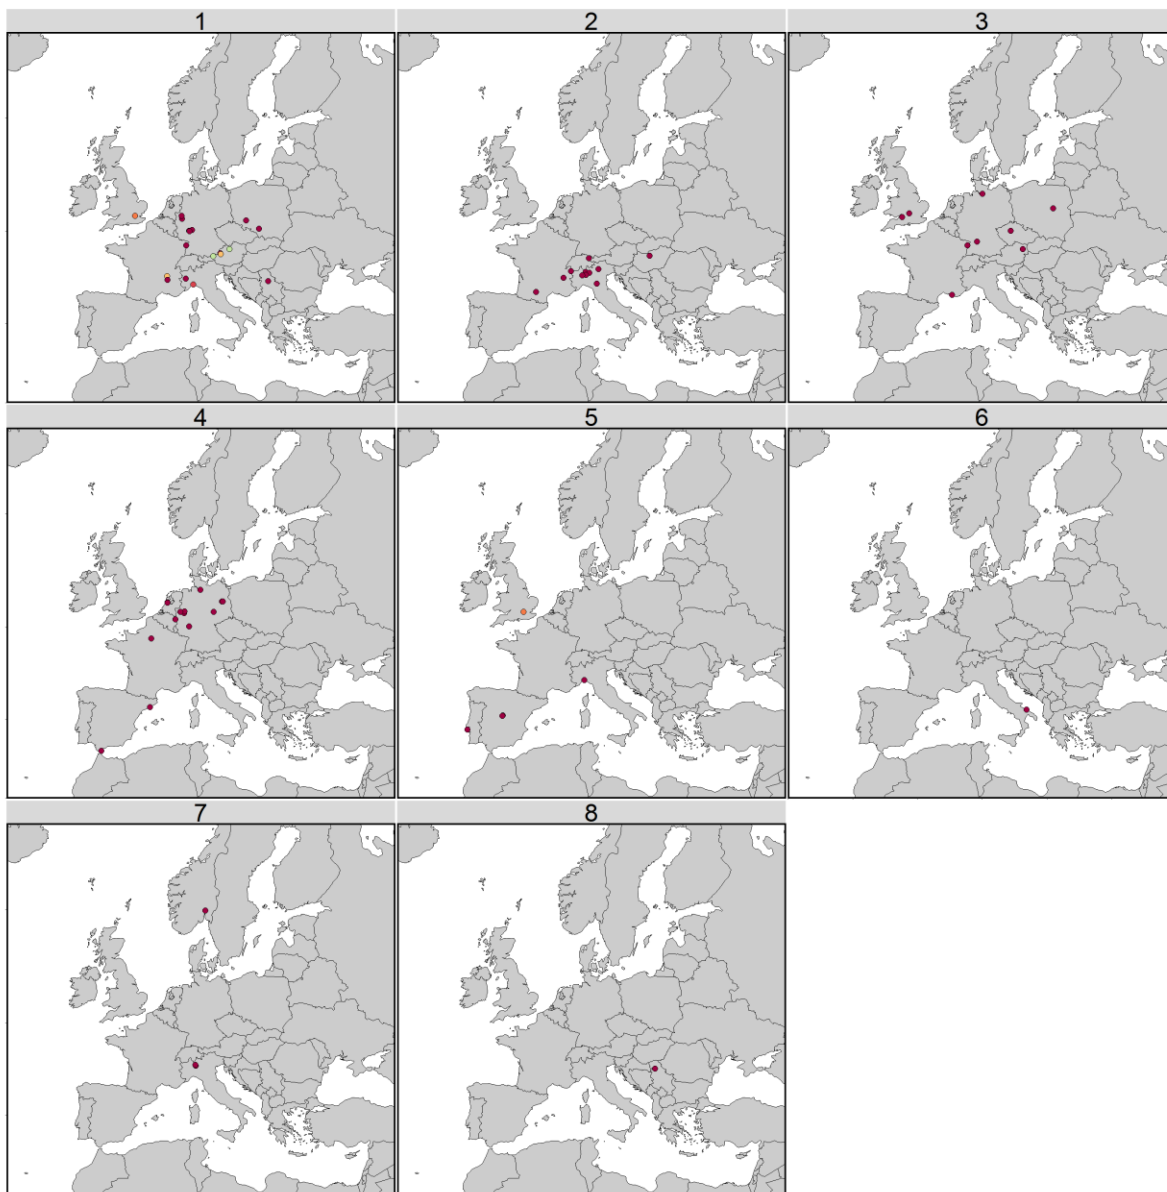

**Classification**

● Rural Traffic 
 ● Suburban Traffic 
 ● Urban Background 
 ● Urban Industrial 
 ● Urban Traffic

**Figure S10:** Map of sites with 2010-2014 annual  $\text{NO}_2$  concentrations ( $\text{NO}_{2\text{AA}}$ ) between  $50\text{-}60 \mu\text{g m}^{-3}$ , grouped into clusters demarcating distinct variations in monthly, hour of day, and hourly  $\text{NO}_2$  concentration bin contributions to 2010-2014  $\text{NO}_{2\text{AA}}$ .

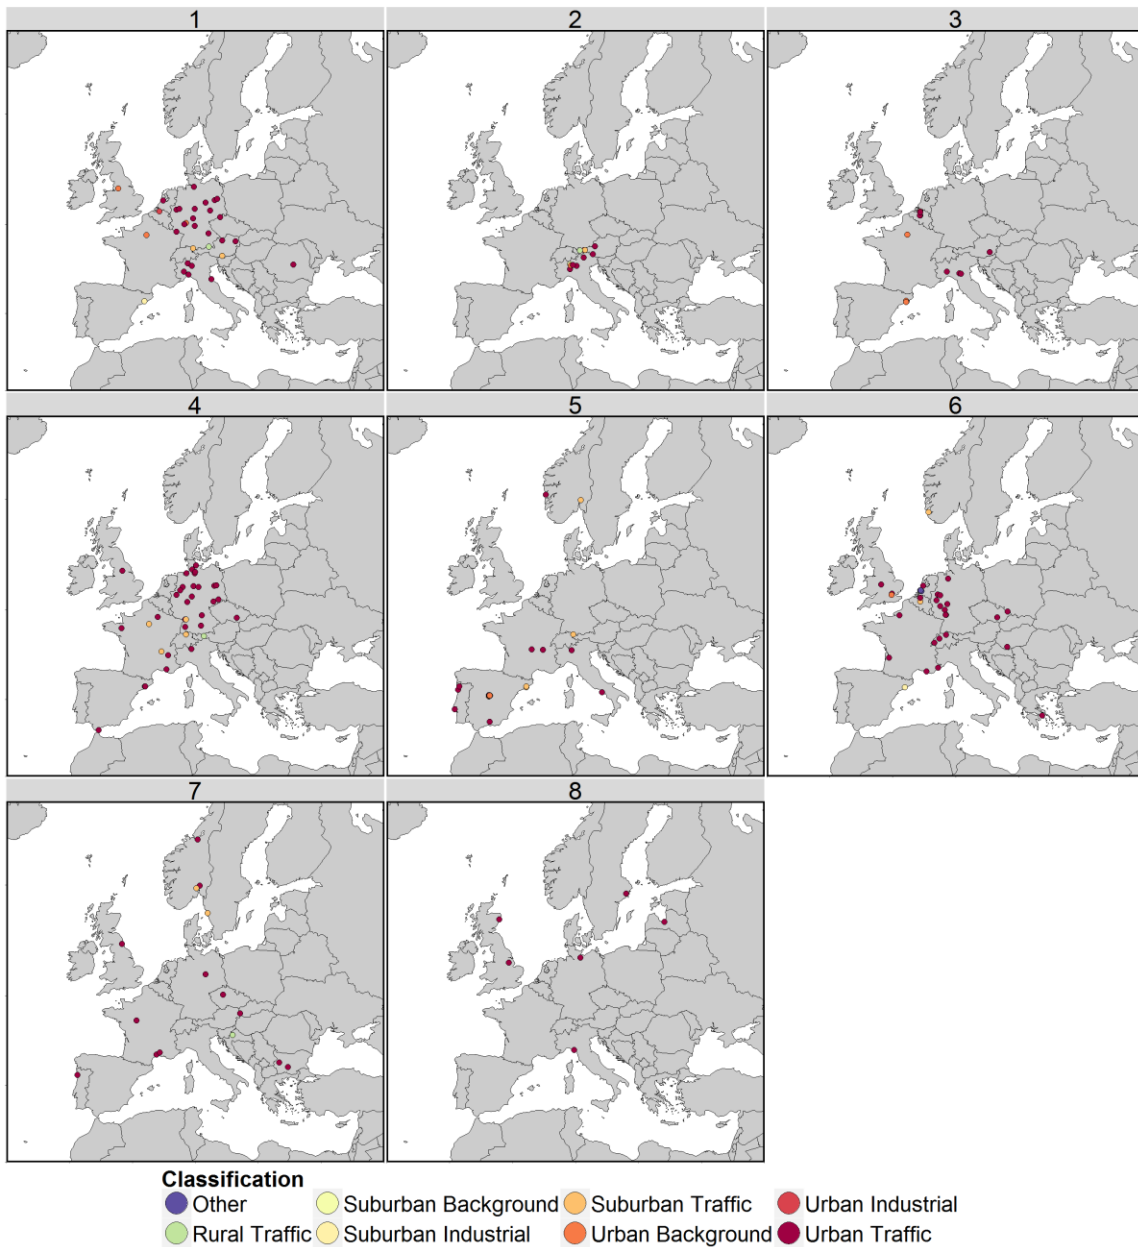

**Figure S11:** Map of sites with 2010-2014 annual  $\text{NO}_2$  concentrations ( $\text{NO}_{2\text{AA}}$ ) between  $40\text{-}50 \mu\text{g m}^{-3}$ , grouped into clusters demarcating distinct variations in monthly, hour of day, and hourly  $\text{NO}_2$  concentration bin contributions to 2010-2014  $\text{NO}_{2\text{AA}}$ .

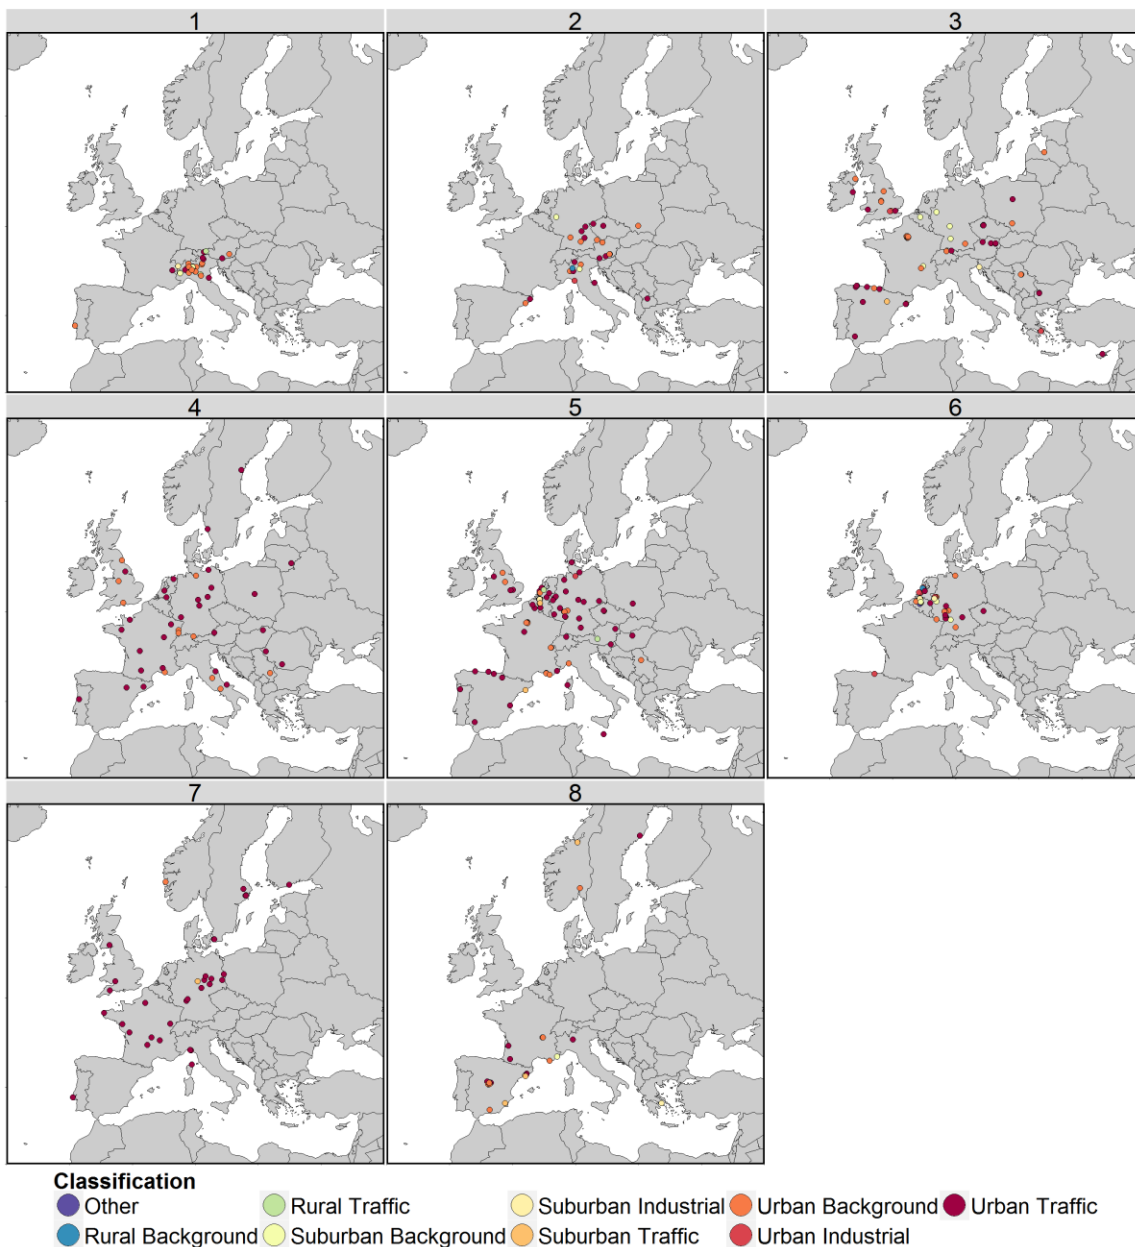

**Figure S12:** Map of sites with 2010-2014 annual  $\text{NO}_2$  concentrations ( $\text{NO}_{2\text{AA}}$ ) between  $30\text{-}40 \mu\text{g m}^{-3}$ , grouped into clusters demarcating distinct variations in monthly, hour of day, and hourly  $\text{NO}_2$  concentration bin contributions to 2010-2014  $\text{NO}_{2\text{AA}}$ .

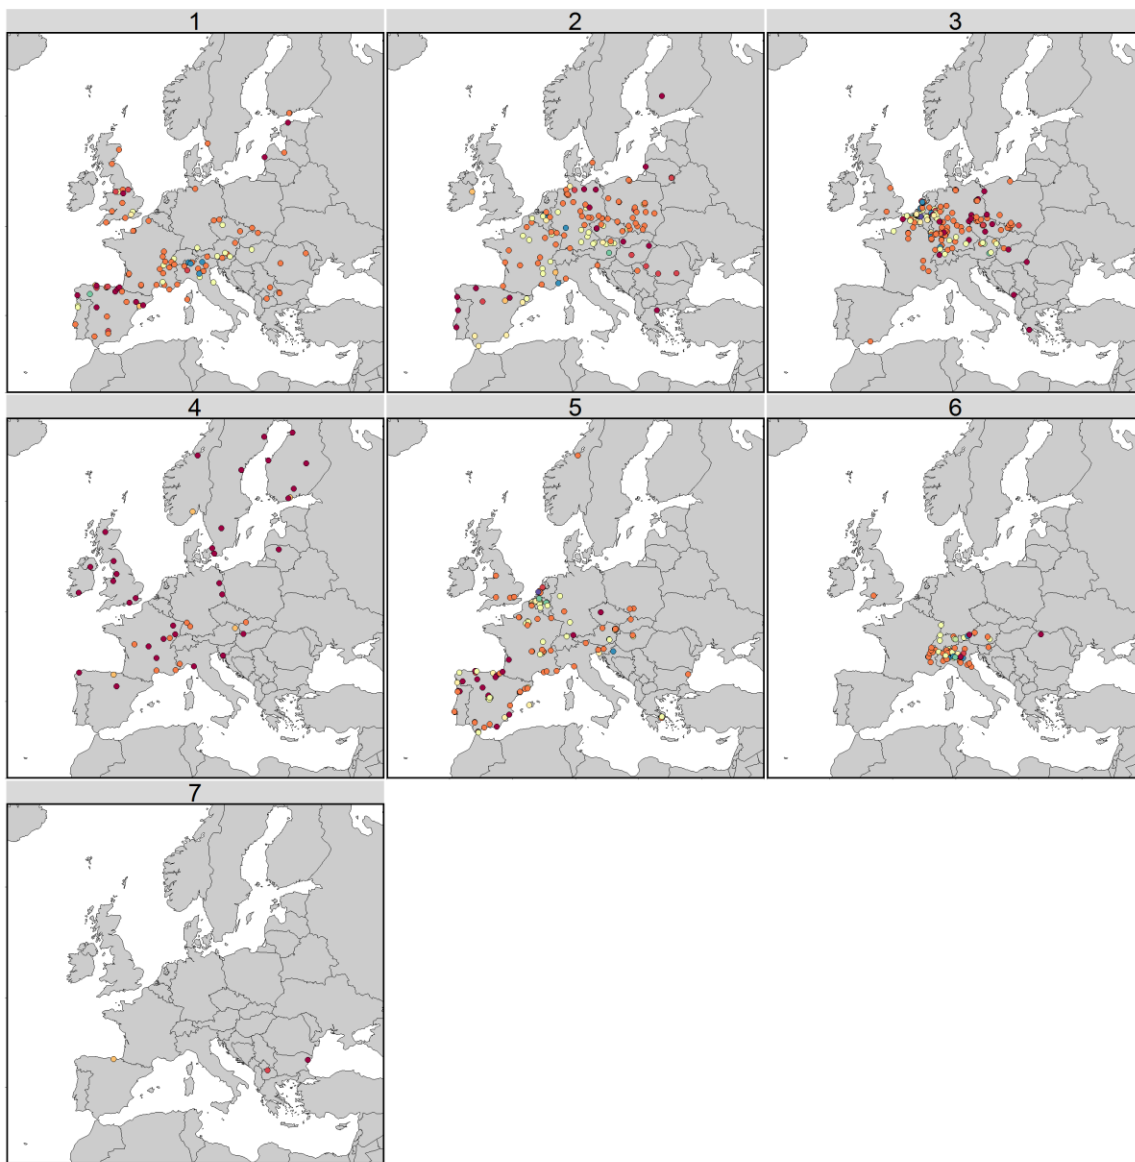

**Classification**

|                    |                    |                       |                    |                    |
|--------------------|--------------------|-----------------------|--------------------|--------------------|
| ● Other            | ● Rural Industrial | ● Suburban Background | ● Suburban Traffic | ● Urban Industrial |
| ● Rural Background | ● Rural Traffic    | ● Suburban Industrial | ● Urban Background | ● Urban Traffic    |

**Figure S13:** Map of sites with 2010-2014 annual NO<sub>2</sub> concentrations (NO<sub>2AA</sub>) between 20-30 μg m<sup>-3</sup>, grouped into clusters demarcating distinct variations in monthly, hour of day, and hourly NO<sub>2</sub> concentration bin contributions to 2010-2014 NO<sub>2AA</sub>.



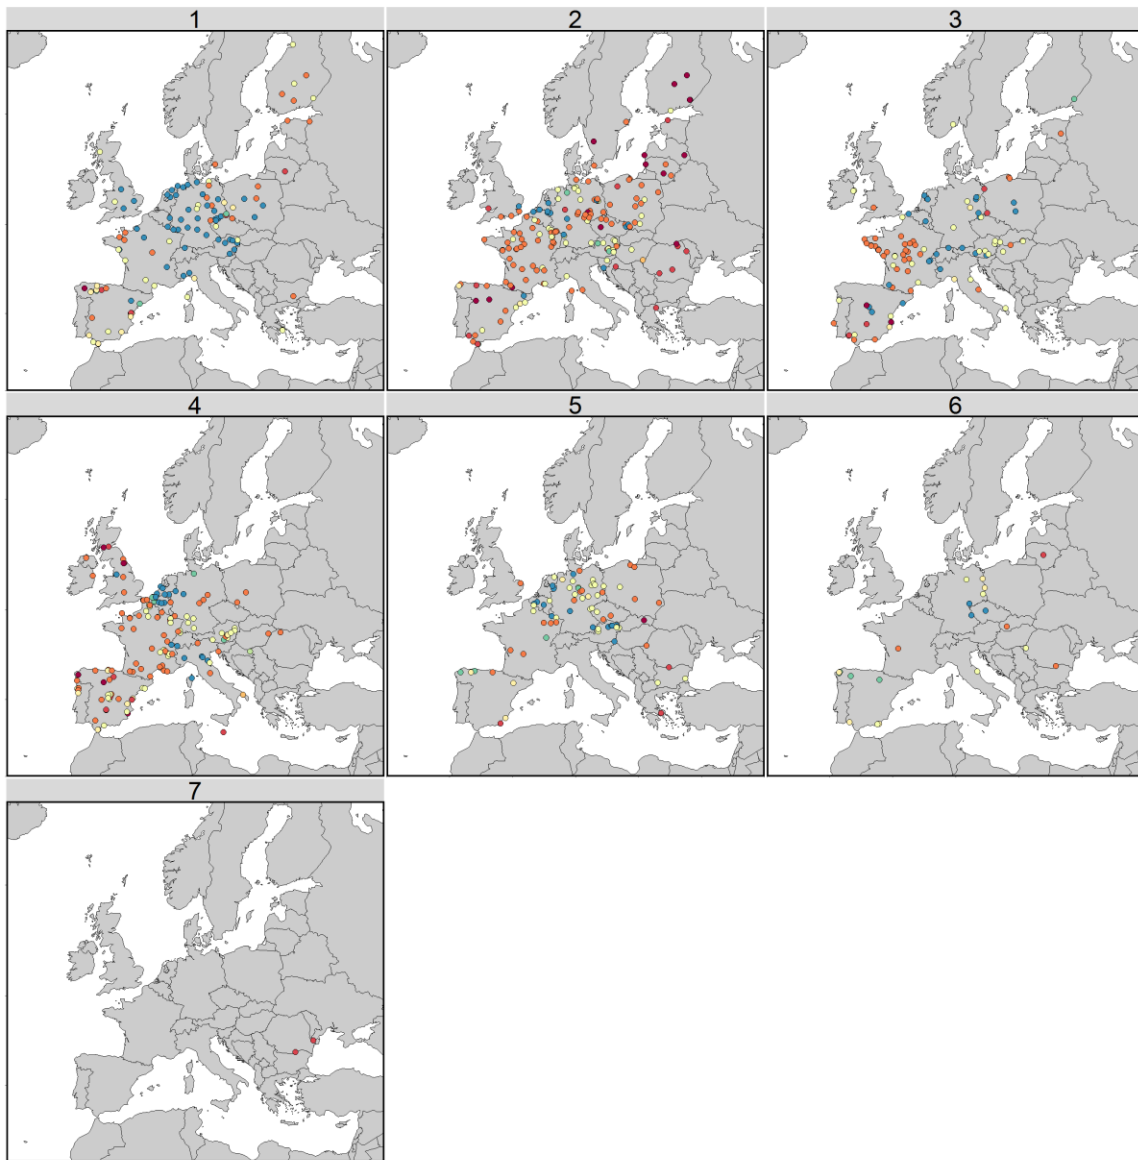

**Classification**

|                    |                    |                       |                    |                    |
|--------------------|--------------------|-----------------------|--------------------|--------------------|
| ● Other            | ● Rural Industrial | ● Suburban Background | ● Suburban Traffic | ● Urban Industrial |
| ● Rural Background | ● Rural Traffic    | ● Suburban Industrial | ● Urban Background | ● Urban Traffic    |

**Figure S14:** Map of sites with 2010-2014 annual  $\text{NO}_2$  concentrations ( $\text{NO}_{2\text{AA}}$ ) between  $10\text{-}20 \mu\text{g m}^{-3}$ , grouped into clusters demarcating distinct variations in monthly, hour of day, and hourly  $\text{NO}_2$  concentration bin contributions to 2010-2014  $\text{NO}_{2\text{AA}}$ .

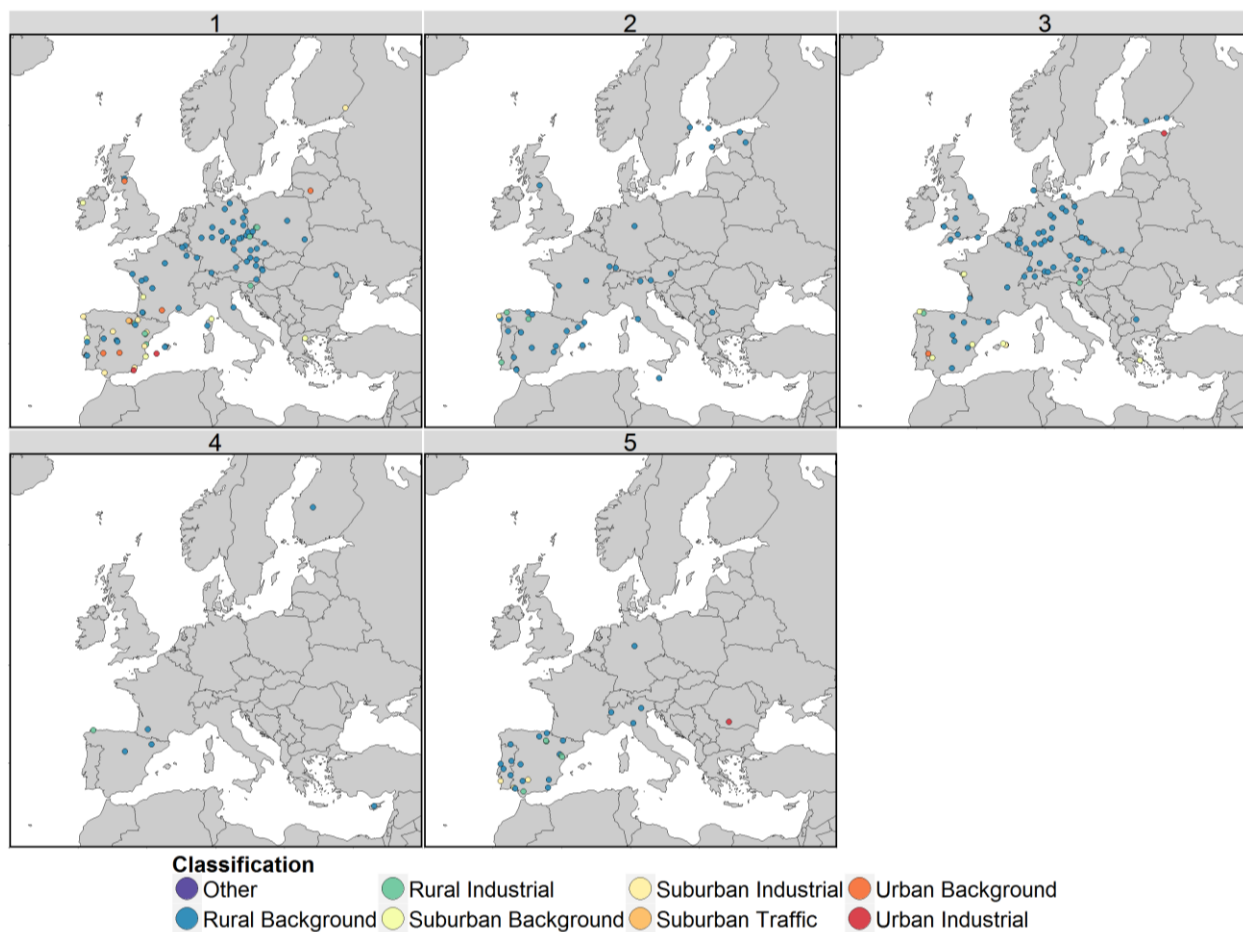

**Figure S15:** Map of sites with 2010-2014 annual  $\text{NO}_2$  concentrations ( $\text{NO}_{2\text{AA}}$ ) between  $0\text{-}10 \mu\text{g m}^{-3}$ , grouped into clusters demarcating distinct variations in monthly, hour of day, and hourly  $\text{NO}_2$  concentration bin contributions to 2010-2014  $\text{NO}_{2\text{AA}}$ .

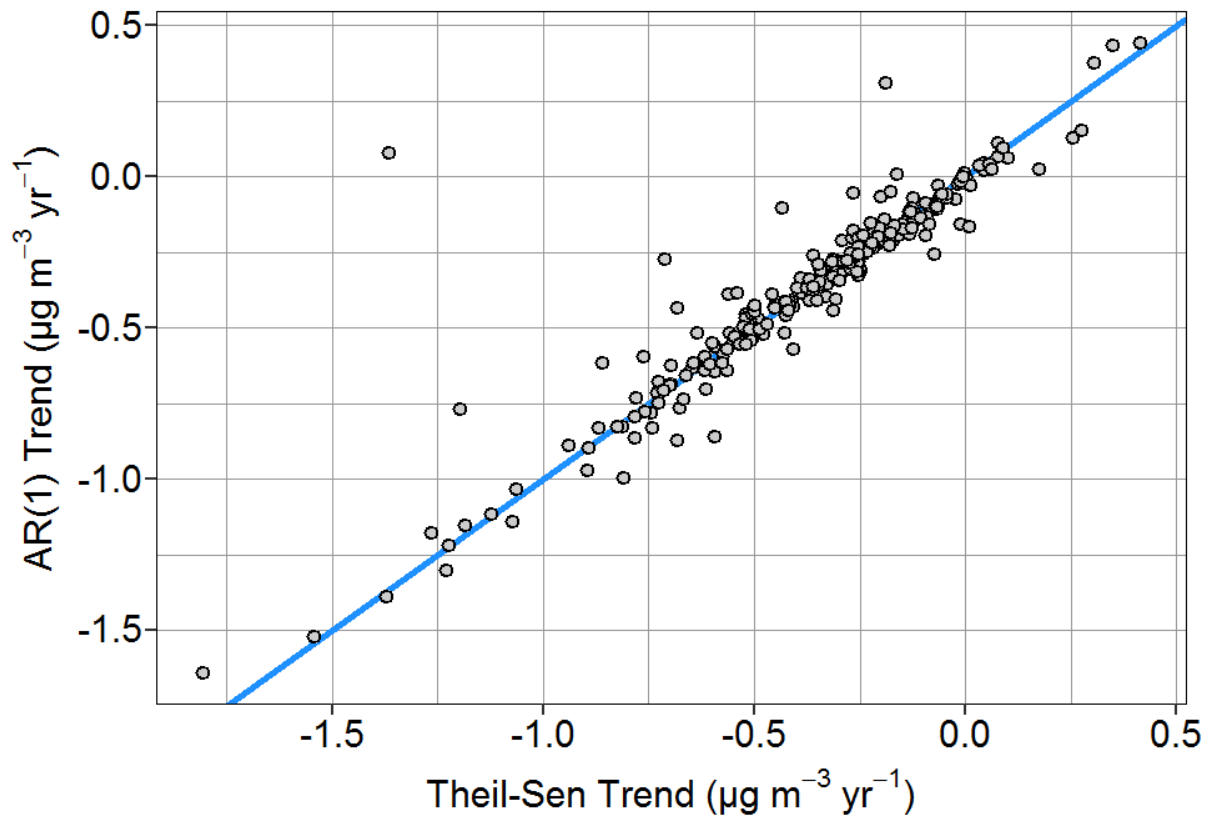

**Figure S16:** Comparison of the direction and magnitude of the trend in annual NO<sub>2</sub> concentrations between 2000 and 2014 at 259 sites across Europe using the Theil-Sen statistic and first order autoregressive (AR(1)) model.

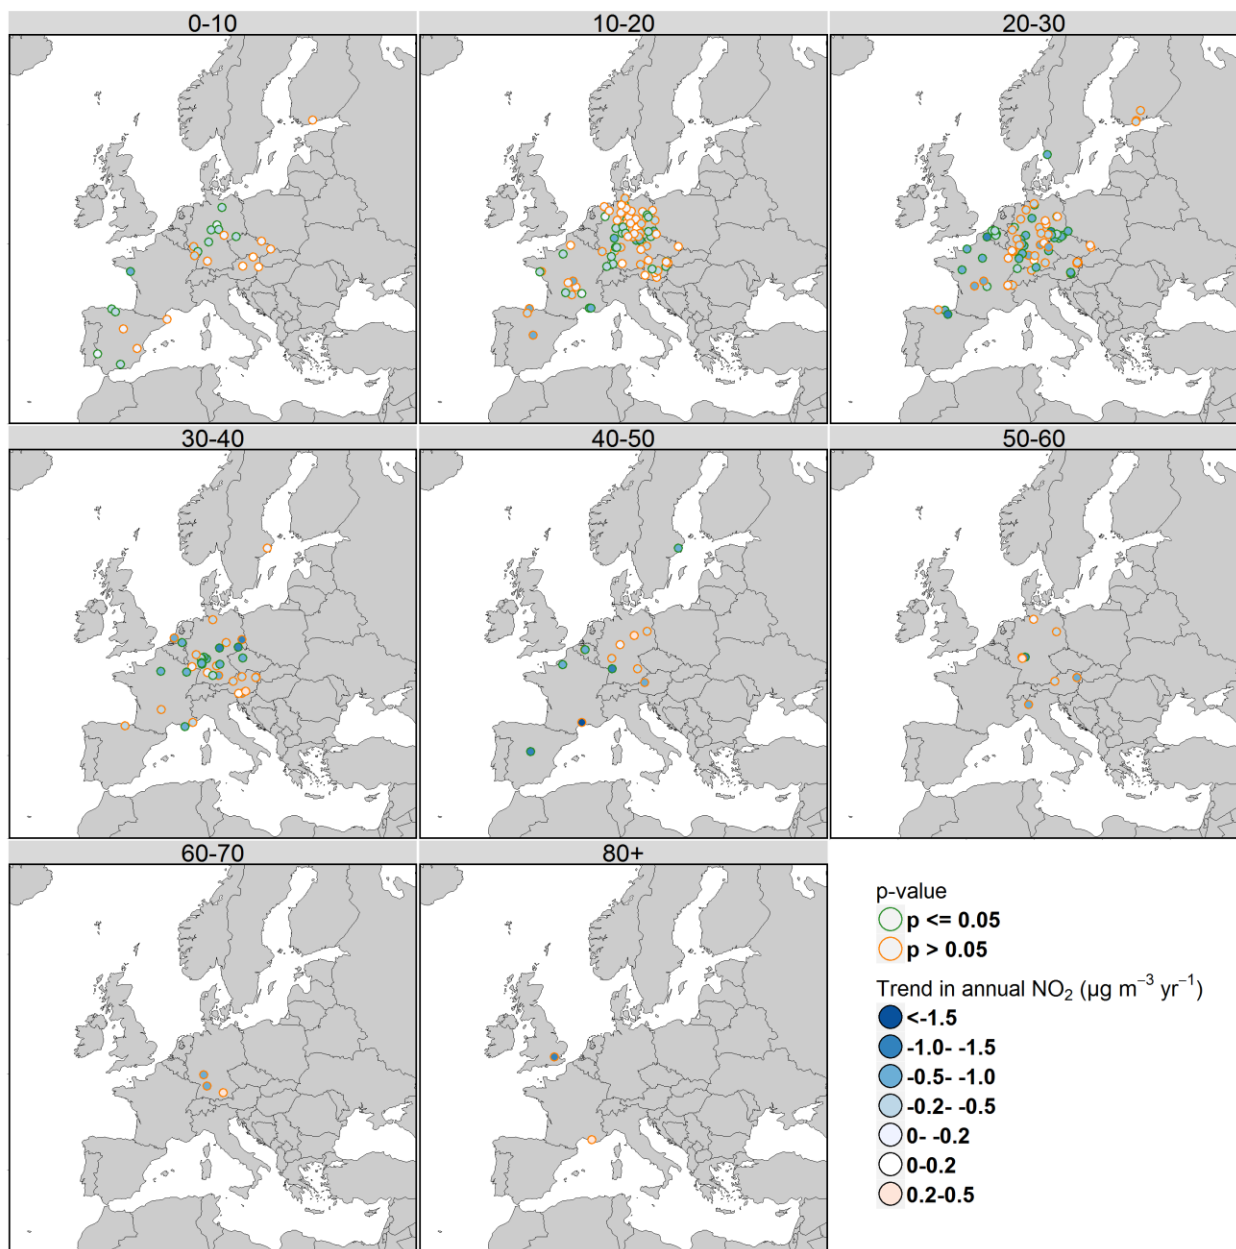

**Figure S17:** Magnitude and significance of trend in annual average  $\text{NO}_2$  concentrations between 2000 and 2014, with sites separated into panels based on 2010-2014 average annual  $\text{NO}_2$  concentrations ( $\text{NO}_{2\text{AA}}$ ). The fill colour in each point denotes the magnitude and direction of the Theil-Sen trend at a site, and the outer colour denotes whether the trend was statistically significant ( $p \leq 0.05$ , green), or not statistically significant ( $p > 0.05$ , orange). Trend estimates were calculated using the Theil-Sen statistic and block bootstrapping.

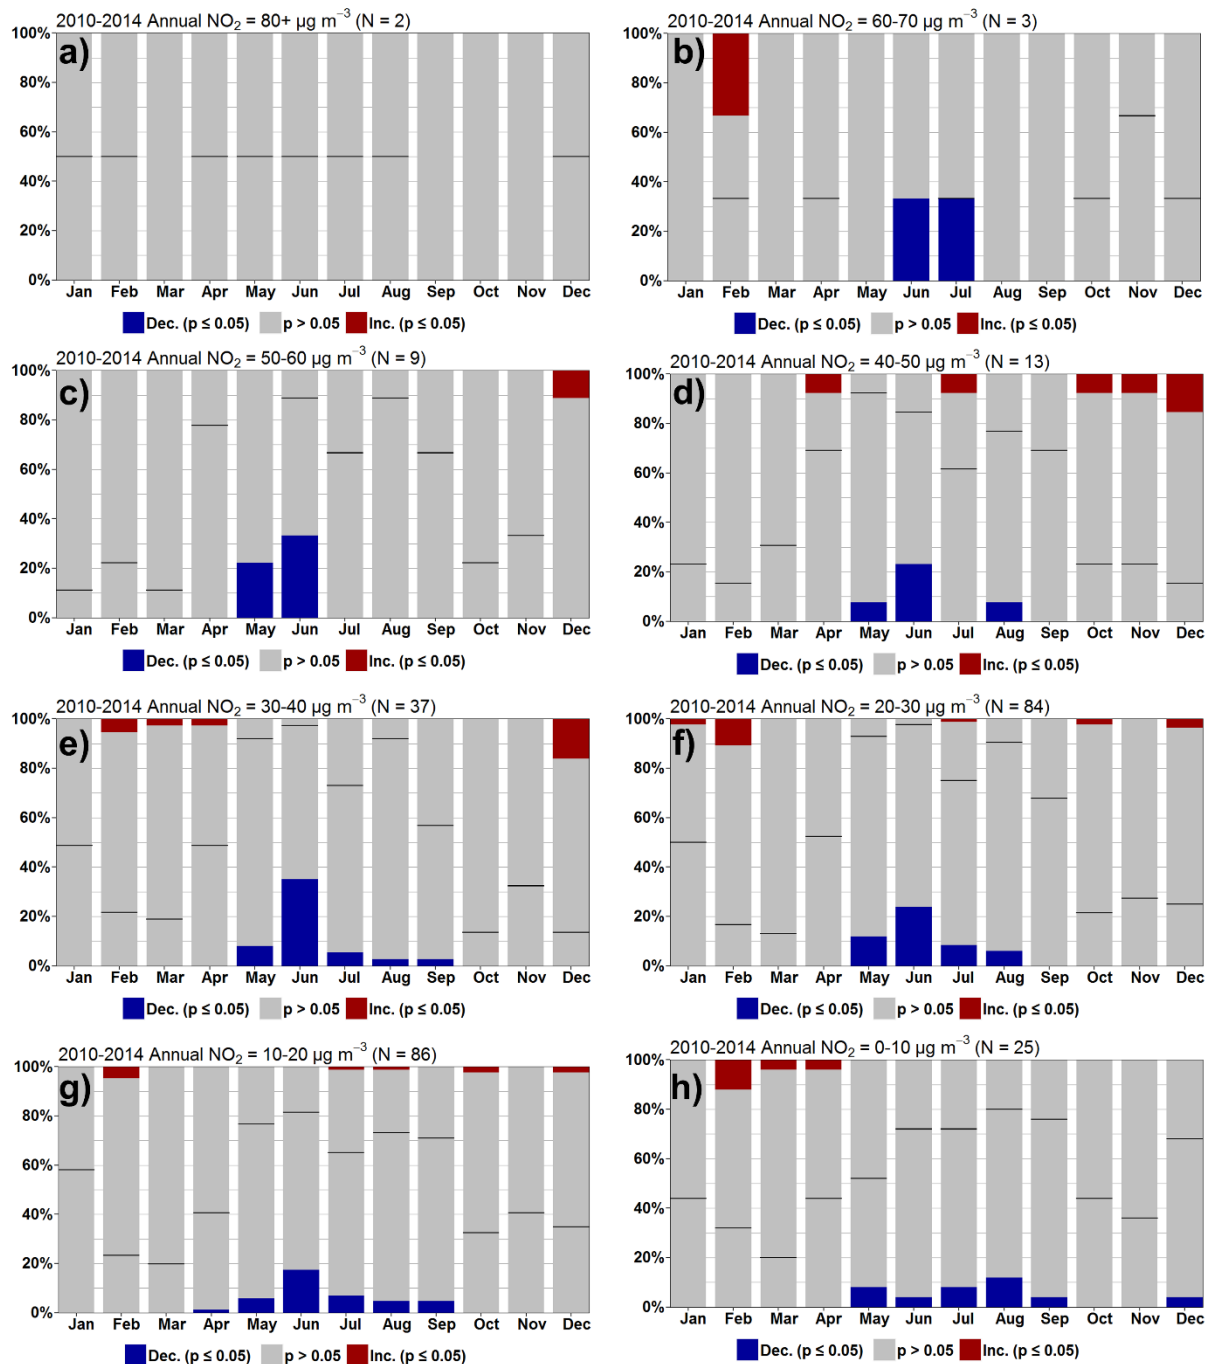

**Figure S18:** Proportion of sites with significant decreasing (blue), increasing (red) ( $p \leq 0.05$ ), and non-significant (grey) trends in the monthly percentage contribution to annual average NO<sub>2</sub> between 2000 and 2014, for sites with 2010-2014 average annual NO<sub>2</sub> concentrations (NO<sub>2AA</sub>) of a) >80 μg m<sup>-3</sup>, b) 60-70 μg m<sup>-3</sup>, c) 50-60 μg m<sup>-3</sup>, d) 40-50 μg m<sup>-3</sup>, 30-40 μg m<sup>-3</sup>, 20-30 μg m<sup>-3</sup>, 10-20 μg m<sup>-3</sup>, 0-10 μg m<sup>-3</sup>. Trend estimates were calculated using the Theil-Sen statistic and block bootstrapping. The black line represents the division between decreasing and increasing trends within the non-significant bar.

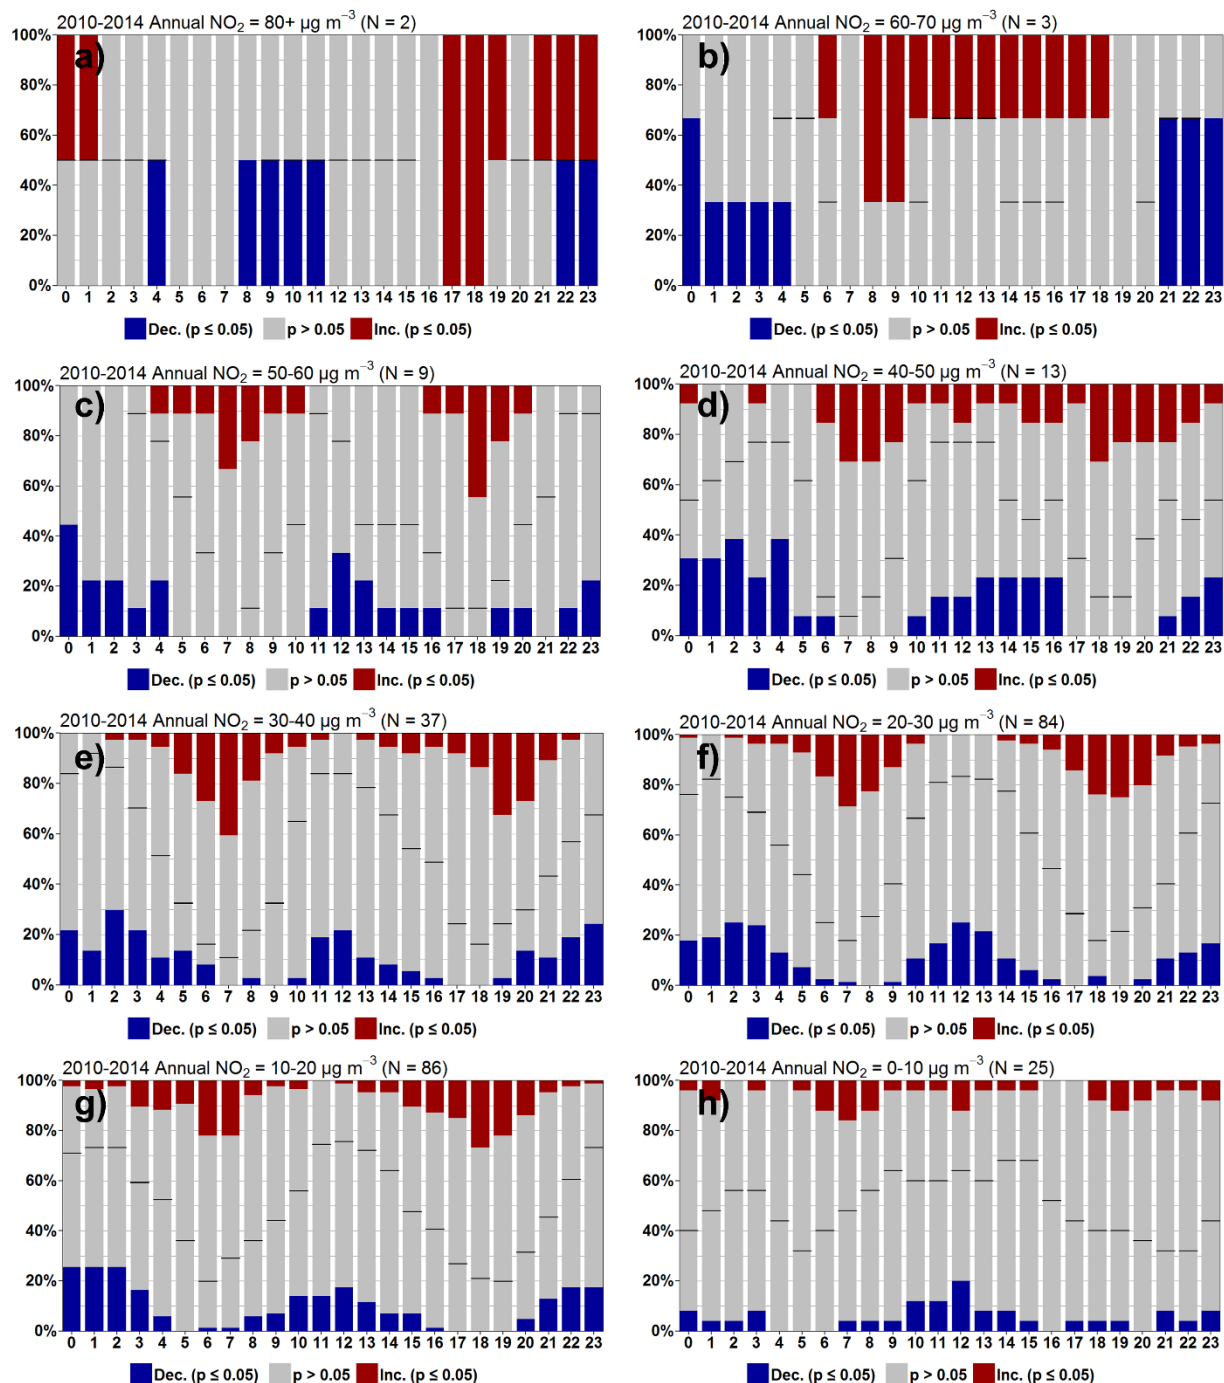

**Figure S19:** Proportion of sites with significant decreasing (blue), increasing (red) ( $p \leq 0.05$ ), and non-significant (grey) trends in the percentage contribution of each hour of day to annual average  $\text{NO}_2$  between 2000 and 2014, for sites with 2010-2014 average annual  $\text{NO}_2$  concentrations ( $\text{NO}_{2\text{AA}}$ ) of a)  $>80 \mu\text{g m}^{-3}$ , b)  $60\text{-}70 \mu\text{g m}^{-3}$ , c)  $50\text{-}60 \mu\text{g m}^{-3}$ , d)  $40\text{-}50 \mu\text{g m}^{-3}$ , e)  $30\text{-}40 \mu\text{g m}^{-3}$ , f)  $20\text{-}30 \mu\text{g m}^{-3}$ , g)  $10\text{-}20 \mu\text{g m}^{-3}$ , h)  $0\text{-}10 \mu\text{g m}^{-3}$ . Trend estimates were calculated using the Theil-Sen statistic and block bootstrapping. The black line represents the division between decreasing and increasing trends within the non-significant bar.

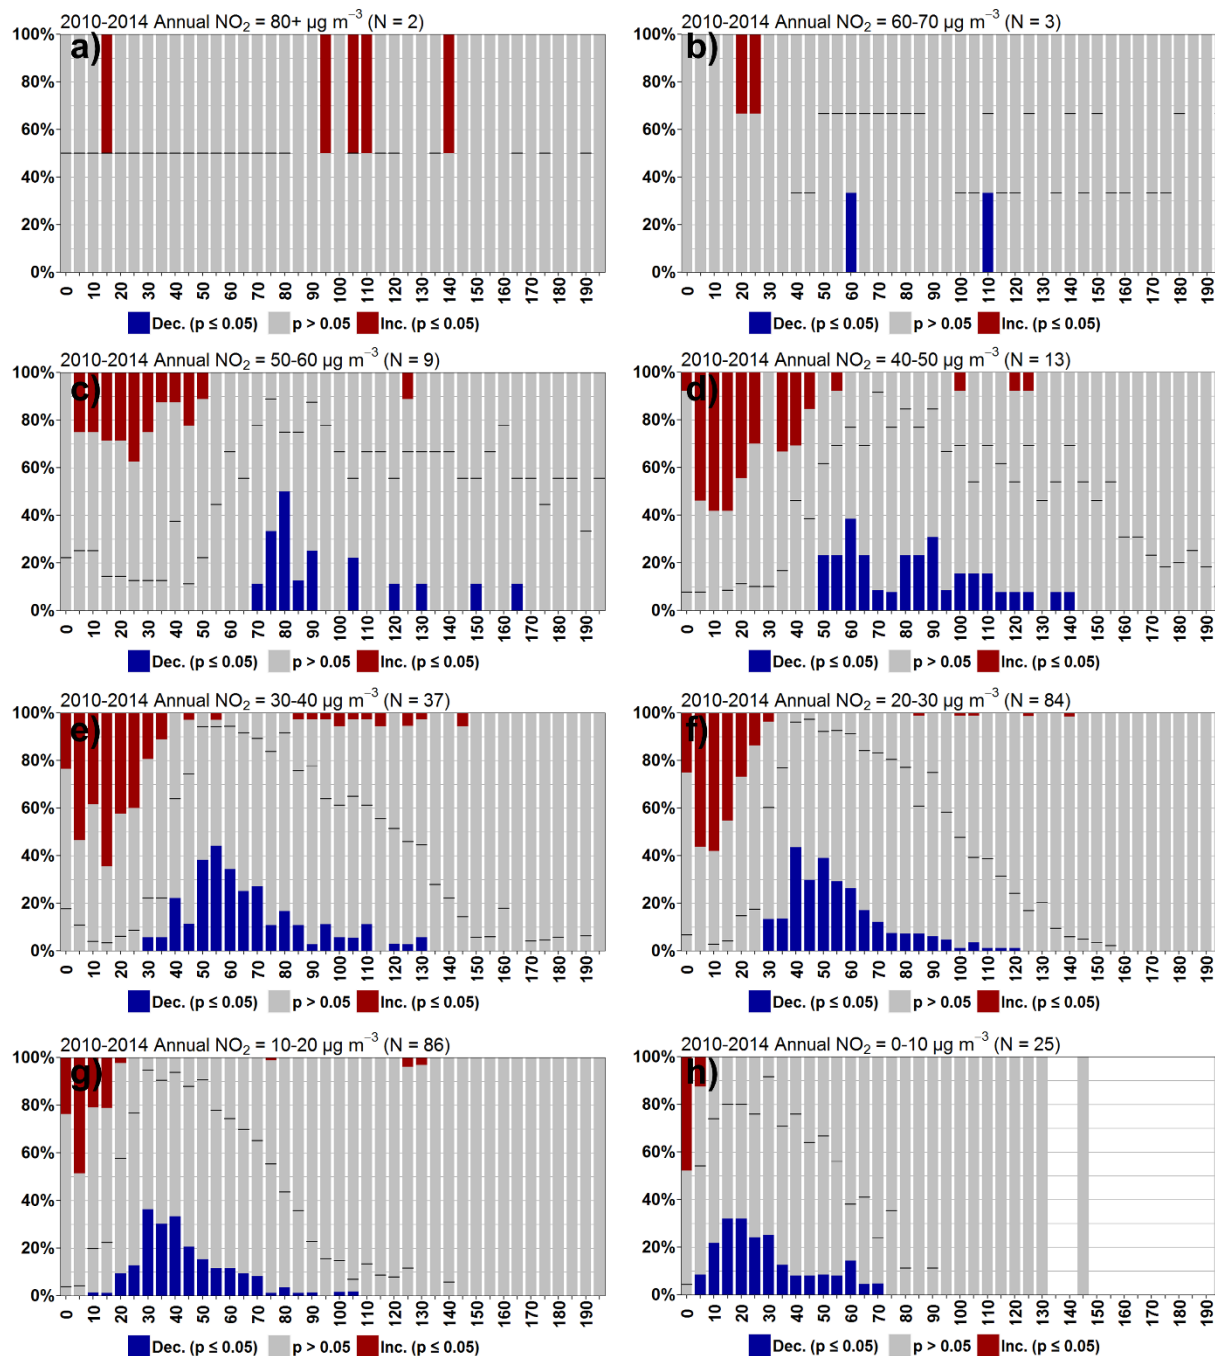

**Figure S20:** Proportion of sites with significant decreasing (blue), increasing (red) ( $p < 0.05$ ), and non-significant (grey) trends in the percentage contribution from hourly NO<sub>2</sub> concentrations in 5 µg m<sup>-3</sup> bins to annual average NO<sub>2</sub> between 2000 and 2014, for sites with 2010-2014 average annual NO<sub>2</sub> concentrations (NO<sub>2,AA</sub>) of a) >80 µg m<sup>-3</sup>, b) 60-70 µg m<sup>-3</sup>, c) 50-60 µg m<sup>-3</sup>, d) 40-50 µg m<sup>-3</sup>, 30-40 µg m<sup>-3</sup>, 20-30 µg m<sup>-3</sup>, 10-20 µg m<sup>-3</sup>, 0-10 µg m<sup>-3</sup>. Trend estimates were calculated using the Theil-Sen statistic and block bootstrapping. The black line represents the division between decreasing and increasing trends within the non-significant bar.
